# Supplementary material
Source: HighWire-hosted journal article supplement (https://thorax.bmj.com/highwire/filestream/174414/field_highwire_adjunct_files/0/Thorax_Appendix_133868.docx)
Supplement: Thorax_Appendix_133868.docx [file Thorax_Appendix_133868.docx]

**“Validation of a Parent-Proxy Quality of Life Questionnaire for Paediatric Chronic Cough (PC-QOL)”**

**Supplementary File**

Supplementary Table 1.

Internal consistency estimates (Cronbach alphas) for PC-QOL domain and total scores at Time 1 and Time 2, including intraclass correlations for Time 1-Time 2 test-retest stability.

|  | Cronbach alphas | |  | Intraclass correlations |
| --- | --- | --- | --- | --- |
| PC-QOL Scale | Time 1 | Time 2 |  | Time 1 – Time 2 |
| Psychological | .90 | .95 |  | .48 |
| Physical | .89 | .94 |  | .51 |
| Social | .70 | .86 |  | .40 |
| Total | .94 | .97 |  | .48 |

Supplementary Figure 1.

Scatterplot of bivariate relationship between mean differences across time for PC-QOL with Cough Counts/Hr.

Supplementary Figure 2.

Scatterplot of bivariate relationship between Cough Counts/Hr at Time 1 compared to Time 2.
